# Supplementary material
Source: publisher figshare collection journal article supplement (https://sage.figshare.com/ndownloader/files/14862131)
Supplement: Supplementary file 1 [file 14862131]

**Supplementary Table 1.** Comparison between genes listed by CAPS GWS 2018 and other two GWS from 2017 and 2004 <sup>4,5</sup>. The differences observed between each GWS is mentioned in the ‘Comments’ column. To avoid ambiguity, same names of genes have been used in most cases instead of aliases.

| <b>CAPS 2018 GWS</b> | <b>2017 GWS</b> | <b>2004 GWS</b> | <b>Comments</b>                                                          |
|----------------------|-----------------|-----------------|--------------------------------------------------------------------------|
|                      |                 | ACPI            | Low Molecular Weight WPTP (acid phosphatase), not considered by CAPS GWS |
|                      | ALPI            |                 | Alkaline Phosphatase, not considered in CAPS GWS                         |
|                      | ALPL            |                 | Alkaline Phosphatase, not considered in CAPS GWS                         |
|                      | ALPP            |                 | Alkaline Phosphatase, not considered in CAPS GWS                         |
|                      | ALPPL2          |                 | Alkaline Phosphatase, not considered in CAPS GWS                         |
| CDC14A               | CDC14A          | CDC14A          |                                                                          |
| CDC14B               | CDC14B          | CDC14B          |                                                                          |
|                      | CDC25A          | CDC25A          | Belongs to different fold, not considered in CAPS GWS                    |
|                      | CDC25B          | CDC25B          | Belongs to different fold, not considered in CAPS GWS                    |
|                      | CDC25C          | CDC25C          | Belongs to different fold, not considered in CAPS GWS                    |
| CDKN3                | CDKN3           | CDKN3           |                                                                          |
| DNAJC6               | DNAJC6          |                 | Not considered in 2004 GWS                                               |
| DUPD1                | DUPD1           | DUPD1           |                                                                          |
| DUSP1                | DUSP1           | DUSP1           |                                                                          |
| DUSP10               | DUSP10          | DUSP10          |                                                                          |
| DUSP11               | DUSP11          | DUSP11          |                                                                          |
| DUSP12               | DUSP12          | DUSP12          |                                                                          |
| DUSP13               | DUSP13          | DUSP13Aa        | Isoforms                                                                 |
|                      |                 | DUSP13Ba        | Isoforms                                                                 |
| DUSP14               | DUSP14          | DUSP14          |                                                                          |
| DUSP15               | DUSP15          | DUSP15          |                                                                          |
| DUSP16               | DUSP16          | DUSP16          |                                                                          |
| DUSP18               | DUSP18          | DUSP18          |                                                                          |
| DUSP19               | DUSP19          | DUSP19          |                                                                          |
| DUSP2                | DUSP2           | DUSP2           |                                                                          |
| DUSP21               | DUSP21          | DUSP21          |                                                                          |
| DUSP22               | DUSP22          | DUSP22          |                                                                          |
| DUSP23               | DUSP23          | DUSP23          |                                                                          |
|                      |                 | DUSP24          | Now referred to as DUSP26                                                |
|                      |                 | DUSP25          | Now referred to as DUSP23                                                |
| DUSP26               | DUSP26          | DUSP26          |                                                                          |
| DUSP27               | DUSP27          |                 | Also referred to as DUPD1                                                |

|        |        |        |                                                                     |
|--------|--------|--------|---------------------------------------------------------------------|
| DUSP28 | DUSP28 |        | Now referred to as DUSP26                                           |
| DUSP3  | DUSP3  | DUSP3  |                                                                     |
| DUSP4  | DUSP4  | DUSP4  |                                                                     |
| DUSP5  | DUSP5  | DUSP5  |                                                                     |
| DUSP6  | DUSP6  | DUSP6  |                                                                     |
| DUSP7  | DUSP7  | DUSP7  |                                                                     |
| DUSP8  | DUSP8  | DUSP8  |                                                                     |
| DUSP9  | DUSP9  | DUSP9  |                                                                     |
| EPM2A  | EPM2A  | EPM2A  |                                                                     |
|        | FIG4   |        | Sac phosphatase, not considered in CAPS GWS                         |
|        |        | EYA1   | Asp-based phosphatase, not considered in CAPS GWS                   |
|        |        | EYA1   | Asp-based phosphatase, not considered in CAPS GWS                   |
|        |        | EYA1   | Asp-based phosphatase, not considered in CAPS GWS                   |
|        |        | EYA1   | Asp-based phosphatase, not considered in CAPS GWS                   |
| GAK    | GAK    |        | Not considered in 2004 GWS                                          |
|        | INPP5F |        | Sac Phosphatase                                                     |
|        | LMWPTP |        | Low Molecular Weight PTP, not considered in CAPS GWS                |
| MTM1   | MTM1   | MTM1   |                                                                     |
| MTMR1  | MTMR1  | MTMR1  |                                                                     |
| MTMR10 | MTMR10 | MTMR10 |                                                                     |
| MTMR11 | MTMR11 | MTMR11 |                                                                     |
| MTMR12 | MTMR12 | MTMR12 |                                                                     |
| MTMR13 | MTMR13 | MTMR13 |                                                                     |
| MTMR14 | MTMR14 | MTMR14 |                                                                     |
|        |        | MTMR15 | Not considered part of Myotubularin family, now referred to as FAN1 |
| MTMR2  | MTMR2  | MTMR2  |                                                                     |
| MTMR3  | MTMR3  | MTMR3  |                                                                     |
| MTMR4  | MTMR4  | MTMR4  |                                                                     |
| MTMR5  | MTMR5  | MTMR5  |                                                                     |
| MTMR6  | MTMR6  | MTMR6  |                                                                     |
| MTMR7  | MTMR7  | MTMR7  |                                                                     |
| MTMR8  | MTMR8  | MTMR8  |                                                                     |
| MTMR9  | MTMR9  | MTMR9  |                                                                     |
| PALD1  | PALD1  |        | Not considered in 2004 GWS                                          |
| PTEN   | PTEN   | PTEN   |                                                                     |
| PTP4A1 | PTP4A1 | PTP4A1 |                                                                     |
| PTP4A2 | PTP4A2 | PTP4A2 |                                                                     |
| PTP4A3 | PTP4A3 | PTP4A3 |                                                                     |

|        |        |         |                                                               |
|--------|--------|---------|---------------------------------------------------------------|
| PTPDC1 | PTPDC1 | PTP9Q22 | Also referred to as PTPDC1                                    |
| PTPMT1 | PTPMT1 |         | Discovered in 2005 <sup>13</sup> , not considered in 2004 GWS |
| PTPN1  | PTPN1  | PTPN1   |                                                               |
| PTPN11 | PTPN11 | PTPN11  |                                                               |
| PTPN12 | PTPN12 | PTPN12  |                                                               |
| PTPN13 | PTPN13 | PTPN13  |                                                               |
| PTPN14 | PTPN14 | PTPN14  |                                                               |
| PTPN18 | PTPN18 | PTPN18  |                                                               |
| PTPN2  | PTPN2  | PTPN2   |                                                               |
| PTPN20 | PTPN20 | PTPN20  |                                                               |
| PTPN21 | PTPN21 | PTPN21  |                                                               |
| PTPN22 | PTPN22 | PTPN22  |                                                               |
| PTPN23 | PTPN23 | PTPN23  |                                                               |
| PTPN3  | PTPN3  | PTPN3   |                                                               |
| PTPN4  | PTPN4  | PTPN4   |                                                               |
| PTPN5  | PTPN5  | PTPN5   |                                                               |
| PTPN6  | PTPN6  | PTPN6   |                                                               |
| PTPN7  | PTPN7  | PTPN7   |                                                               |
| PTPN9  | PTPN9  | PTPN9   |                                                               |
| PTPRA  | PTPRA  | PTPRA   |                                                               |
| PTPRB  | PTPRB  | PTPRB   |                                                               |
| PTPRC  | PTPRC  | PTPRC   |                                                               |
| PTPRD  | PTPRD  | PTPRD   |                                                               |
| PTPRE  | PTPRE  | PTPRE   |                                                               |
| PTPRF  | PTPRF  | PTPRF   |                                                               |
| PTPRG  | PTPRG  | PTPRG   |                                                               |
| PTPRH  | PTPRH  | PTPRH   |                                                               |
| PTPRJ  | PTPRJ  | PTPRJ   |                                                               |
| PTPRK  | PTPRK  | PTPRK   |                                                               |
| PTPRM  | PTPRM  | PTPRM   |                                                               |
| PTPRN  | PTPRN  | PTPRN   |                                                               |
| PTPRN2 | PTPRN2 | PTPRN2  |                                                               |
| PTPRO  | PTPRO  | PTPRO   |                                                               |
| PTPRQ  | PTPRQ  | PTPRQ   |                                                               |
| PTPRR  | PTPRR  | PTPRR   |                                                               |
| PTPRS  | PTPRS  | PTPRS   |                                                               |
| PTPRT  | PTPRT  | PTPRT   |                                                               |
| PTPRU  | PTPRU  | PTPRU   |                                                               |
|        |        | PTPRV   | Now referred to as pseudophosphatase <sup>14</sup>            |

|        |        |        |                                                       |
|--------|--------|--------|-------------------------------------------------------|
| PTPRZ1 | PTPRZ1 | PTPRZ1 |                                                       |
| RNGTT  | RNGTT  | RNGTT  |                                                       |
|        | SACM1L |        | Sac Phosphatase, not considered in CAPS GWS           |
| SSH1   | SSH1   | SSH1   |                                                       |
| SSH2   | SSH2   | SSH2   |                                                       |
| SSH3   | SSH3   | SSH3   |                                                       |
|        | SSU72  |        | Belongs to different fold, not considered in CAPS GWS |
| STYX   | STYX   | STYX   |                                                       |
| STYXL1 | STYXL1 | STYXL1 |                                                       |
|        | SYNJ1  |        | Sac Phosphatase, not considered in CAPS GWS           |
|        | SYNJ2  |        | Sac Phosphatase, not considered in CAPS GWS           |
| TNS1   | TNS1   | TNS    | Now referred to as TNS1                               |
| TNS2   | TNS2   | TENC1  | Now referred to as TNS2                               |
| TNS3   | TNS3   |        |                                                       |
| TPTE   | TPTE   | TPTE   |                                                       |
| TPTE2  | TPTE2  | TPIP   | Now referred to as TPTE2                              |

**Supplementary Table 2.** Details of the **thirty-seven** domains the gene products containing tyrosine phosphatase domains associate with. Pfam, InterPro and/or CDD IDs have been provided for the domains in most cases. The entries in the 2<sup>nd</sup> column which are marked in bold correspond to domains which were not reported by the CAPS 2003 GWS. Asterisk symbols in the 1<sup>st</sup> column indicate the three domains newly found to associate with catalytic domains of tyrosine phosphatases.

| S.No. | Domain Abbreviation | Name of the domain                           | Domain Database IDs | Function                                                                                                                                                           |
|-------|---------------------|----------------------------------------------|---------------------|--------------------------------------------------------------------------------------------------------------------------------------------------------------------|
| 1     | <b>ALIX</b>         | ALIX V-shaped domain or ALIX_LYPXL_bnd       | Pfam: PF13949       | Binding of the LYPxL motif of late HIV p6Gag and EIAV p9Gag proteins to this domain is necessary for viral budding                                                 |
| 2     | BRO1                | BRO1-like domain                             | Pfam: PF03097       | Known to have a role in endosomal targeting                                                                                                                        |
| 3     | <b>C1 or C1_1</b>   | phorbol esters/diacylglycerol binding domain | Pfam: PF00130       | Binds an important secondary messenger diacylglycerol (DAG), as well as the analogous phorbol esters. Phorbol esters can directly stimulate protein kinase C, PKC. |

|     |                    |                                                                                          |               |                                                                                                                                                                             |
|-----|--------------------|------------------------------------------------------------------------------------------|---------------|-----------------------------------------------------------------------------------------------------------------------------------------------------------------------------|
| 4   | <b>C2</b>          | C2 domain of PTEN tumour-suppressor protein                                              | Pfam: PF10409 | This domain associates across an extensive interface with the N-terminal phosphatase domain DSPc and possibly positions the catalytic part of the protein onto the membrane |
| 5   | Carbonic Anhydrase | Carbonic Anhydrase                                                                       | Pfam: PF00194 | Catalyse the reversible hydration of carbon dioxide to bicarbonate                                                                                                          |
| 6   | CBM20              | Carbohydrate-binding module                                                              | Pfam: PF00686 | Known to have carbohydrate-binding activity                                                                                                                                 |
| 7   | <b>CD45</b>        | Leukocyte receptor CD45                                                                  | Pfam: PF12567 | It is required for T-cell activation through the antigen receptor                                                                                                           |
| 8   | <b>CC</b>          | Coiled-coil                                                                              |               | A structural motif which aids in dimerization of myotubularins                                                                                                              |
| 9   | CRAL_TRIO          | Named after Cell RetinALdehyde-binding protein (CRALBP) and TRIO guanine exchange factor | Pfam: PF00650 | It binds small lipophilic molecules                                                                                                                                         |
| 10  | <b>DEK_C</b>       | DEK C-terminal domain                                                                    | Pfam: PF08766 | A chromatin associated protein that is linked with cancers and autoimmune disease                                                                                           |
| 11  | <b>DENN</b>        | DENN (AEX-3) domain or Differentially Expressed In Neoplastic vs Normal Cells            | Pfam: PF02141 | Occurs in several proteins involved in Rab- mediated processes or regulation of MAPK signalling pathways, function unclear                                                  |
| 12  | DNA-J              | Chaperone DnaJ                                                                           | Pfam: PF00226 | DnaJ-domain is associated with hsp70 heat-shock system and is part of a chaperone (protein folding) system                                                                  |
| 13* | <b>Endomucin</b>   | Endomucin                                                                                | Pfam: PF07010 | An early endothelial-specific antigen that is also expressed on putative hematopoietic progenitor cells                                                                     |
| 14  | <b>FA</b>          | FERM adjacent                                                                            | Pfam: PF08736 | This region is found adjacent to FERM domains and has                                                                                                                       |

|    |             |                                                                                                                                                                                            |               |                                                                                                                                                                                                                              |
|----|-------------|--------------------------------------------------------------------------------------------------------------------------------------------------------------------------------------------|---------------|------------------------------------------------------------------------------------------------------------------------------------------------------------------------------------------------------------------------------|
|    |             |                                                                                                                                                                                            |               | been hypothesised to play a role in regulatory adaptation                                                                                                                                                                    |
| 15 | FERM        | FERM domain (F for 4.1 protein, E for ezrin, R for radixin and M for moesin)                                                                                                               | Pfam: PF00373 | Involved in localising proteins to the plasma membrane                                                                                                                                                                       |
| 16 | fn3         | Fibronectin type III domain                                                                                                                                                                | Pfam: PF00041 | Involved in cell adhesion, cell morphology, thrombosis, cell migration, and embryonic differentiation                                                                                                                        |
| 17 | FYVE        | FYVE zinc finger domain is named after the four cysteine-rich proteins: Fab 1 (yeast orthologue of PIKfyve), YOTB, Vac 1 (vesicle transport protein), and EEA1, in which it has been found | Pfam: PF01363 | FYVE domains bind Phosphatidylinositol 3-phosphate and is implicated in vacuolar protein sorting and endosome function                                                                                                       |
| 18 | Ig          | Immunoglobulin domain                                                                                                                                                                      | Pfam: PF00047 | Involved in the recognition, binding, or adhesion processes of cells                                                                                                                                                         |
| 19 | Kinase      | Protein kinase domain                                                                                                                                                                      | Pfam: PF00069 | Catalyse the transfer of the gamma phosphate from nucleotide triphosphates (often ATP) to one or more amino acid residues in a protein substrate side chain, resulting in a conformational change affecting protein function |
| 20 | <b>KIND</b> | Kinase non-catalytic C-lobe domain                                                                                                                                                         | Pfam: PF16474 | Has evolved from a catalytic protein kinase fold and functions as an interaction domain                                                                                                                                      |
| 21 | MAM         | Meprin, A-5 protein, and receptor protein-tyrosine phosphatase mu                                                                                                                          | Pfam: PF00629 | It occurs in several cell surface proteins and is likely to have an adhesive function. Known to play a role in homodimerization of protein-tyrosine phosphatase mu                                                           |

|     |                          |                                                                                                                                                           |               |                                                                                                                                                                                                   |
|-----|--------------------------|-----------------------------------------------------------------------------------------------------------------------------------------------------------|---------------|---------------------------------------------------------------------------------------------------------------------------------------------------------------------------------------------------|
| 22  | mRNA cap enzyme          | mRNA capping enzyme                                                                                                                                       | Pfam: PF01331 | A mRNA guanyltransferase and RNA 5'-triphosphatase                                                                                                                                                |
| 23  | PDZ                      | Name from the three proteins- post synaptic density protein (PSD95), Drosophila disc large tumor suppressor (Dlg1), and zonula occludens-1 protein (zo-1) | Pfam: PF00595 | Play a key role in anchoring receptor proteins in the membrane to cytoskeletal components                                                                                                         |
| 24  | <b>PDZ-binding motif</b> | PDZ-binding motif or PDZ domain binding                                                                                                                   |               | Predicted sequence motif which recognises PDZ domain containing proteins                                                                                                                          |
| 25  | <b>PH</b>                | Pleckstrin Homology                                                                                                                                       | Pfam: PF00169 | Ooccurs in a wide range of proteins involved in intracellular signaling or as constituents of the cytoskeleton                                                                                    |
| 26  | GRAM                     | Glucosyltransferases, Myotubularins and other membrane-associated proteins                                                                                | Pfam: PF02893 | Implicated in intracellular protein-binding or lipid-binding signalling domain                                                                                                                    |
| 27  | PTB                      | Phosphotyrosine interaction domain (PTB/PID)                                                                                                              | Pfam: PF00640 | Function as adaptors or scaffolds to organise the signaling complexes involved in wide-ranging physiological processes including neural development, immunity, tissue homeostasis and cell growth |
| 28* | <b>PTN13_u3</b>          | Unstructured linker region on PTN13 protein between PDZ                                                                                                   | Pfam: PF16599 | Allows flexibility between the PDZ domains                                                                                                                                                        |
| 29  | <b>PTP_N</b>             | Protein tyrosine phosphatase N terminal                                                                                                                   | Pfam: PF12453 | Found in association with fn3 domains in proteins such as CD45 which limits growth signalling in haematopoietic cells                                                                             |
| 30  | <b>Receptor-IA2</b>      | Protein-tyrosine phosphatase receptor IA-2                                                                                                                | Pfam: PF11548 | Upon exocytosis, the cytoplasmic domain of IA-2 is cleaved and moves to the nucleus where it enhances transcription of the insulin gene                                                           |

|     |                                |                                                                                                      |               |                                                                                                                                                 |
|-----|--------------------------------|------------------------------------------------------------------------------------------------------|---------------|-------------------------------------------------------------------------------------------------------------------------------------------------|
| 31  | <b>RESP18</b>                  | Name derives from glucocorticoid-responsive protein regulated endocrine-specific protein 18 (RESP18) | Pfam: PF14948 | N-terminal extracellular region of receptor-type tyrosine-protein phosphatases containing the protein-tyrosine phosphatase receptor IA-2 domain |
| 32  | <b>Rhodanese</b>               | Rhodanese                                                                                            | Pfam: PF00581 | A mitochondrial enzyme that detoxifies cyanide (CN <sup>-</sup> ) by converting it to thiocyanate (SCN <sup>-</sup> )                           |
| 33* | <b>Ricin or Ricin B-lectin</b> | Ricin-type beta-trefoil lectin domain                                                                | Pfam: PF00652 | Domain with homology with Lectins, predicted carbohydrate binding function.                                                                     |
| 34  | <b>Sec14</b>                   | Sec14p-like lipid-binding domain                                                                     | CDD: cl15787  | Found in secretory proteins, it is a lipid-binding domain                                                                                       |
| 35  | <b>SH2</b>                     | Src Homology 2) domain                                                                               | Pfam: PF00017 | SH2 domains allow proteins containing those domains to dock to phosphorylated tyrosine residues on other proteins                               |
| 36  | <b>SSH_N</b>                   | N-terminal domain conserved in slingshot (SSH) phosphatases                                          | CDD: cd11652  | May be involved in P-cofilin binding                                                                                                            |
| 37  | <b>TMH</b>                     | Transmembrane Helix                                                                                  |               |                                                                                                                                                 |

**Supplementary Table 3:** Few details about the three domains which are being reported for the first time to co-occur with tyrosine phosphatases. The E-values with which the domains were annotated by either of the domain annotation methods used, have been listed in columns 2 and 3 of the table. Under additional information, related literature evidence have been provided.

| Domain Name    | CD-search                        | hmmsearch | Additional Information                                                                                                                                                                                                                                                                                                                   |
|----------------|----------------------------------|-----------|------------------------------------------------------------------------------------------------------------------------------------------------------------------------------------------------------------------------------------------------------------------------------------------------------------------------------------------|
| Ricin B-lectin | 10E-4                            | 10E-5     | Within the Ricin B-like lectins superfamily (50370) in SCOPe, an existing structure of a mouse Ricin B-lectin domain (d1xhba1) was found. It belonged to the murine enzyme, UDP-GalNAc:polypeptide $\alpha$ -Nacetylgalactosaminyltransferase-T1 or ppGaNTase-T1. The motifs in its sequence were: Q-X-F, Q-X-W and Q-X-W. <sup>28</sup> |
| Endomucin      | 10E-5 (PTPRA) and 10E-10 (PTPRC) | -         | Endomucin is known to be heavily glycosylated with O-linked glycans <sup>30,31</sup> and several serine and threonine residues were                                                                                                                                                                                                      |



|          |         |        |                                                                                                                                                                                                                                                                                                                                                                                                                                                                                                                                                                                                                                                                                                                                                                                             |
|----------|---------|--------|---------------------------------------------------------------------------------------------------------------------------------------------------------------------------------------------------------------------------------------------------------------------------------------------------------------------------------------------------------------------------------------------------------------------------------------------------------------------------------------------------------------------------------------------------------------------------------------------------------------------------------------------------------------------------------------------------------------------------------------------------------------------------------------------|
|          |         |        | <p>also observed in the sequence stretches of PTPRA and PTPRC predicted to be Endomucin domain. PTPRA is known to be a regulator of the focal adhesion kinase<sup>31</sup> and it has been seen that the extracellular region of PTPRA, and not the catalytic domain, is required for modulation of cell surface expression of a neural adhesion molecule, NB-3.<sup>32</sup> Mutations in PTPRA are associated with conditions like schizophrenia, myocardial ischemia and others. CD45 or PTPRA is a hematopoietic tyrosine phosphatase and is critical for lymphocyte signalling. Role of PTPRC in adhesion in context of T cell adhesion has been well documented till date.<sup>31,33,34</sup> Mutations in this gene are implicated in severe autoimmune and infectious diseases.</p> |
| PTN13_u3 | 10E-103 | 10E-73 | <p>A similar linker region, albeit shorter, has recently been reported in PTPN4 and this linker along with the adjacent PDZ domain were found to be crucial in allosteric regulation of the catalytic domain.<sup>36</sup> All the transcripts of the gene PTPN13 (ENSG00000163629) were annotated by the PTN13_u3 domain, in Ensembl.</p>                                                                                                                                                                                                                                                                                                                                                                                                                                                  |

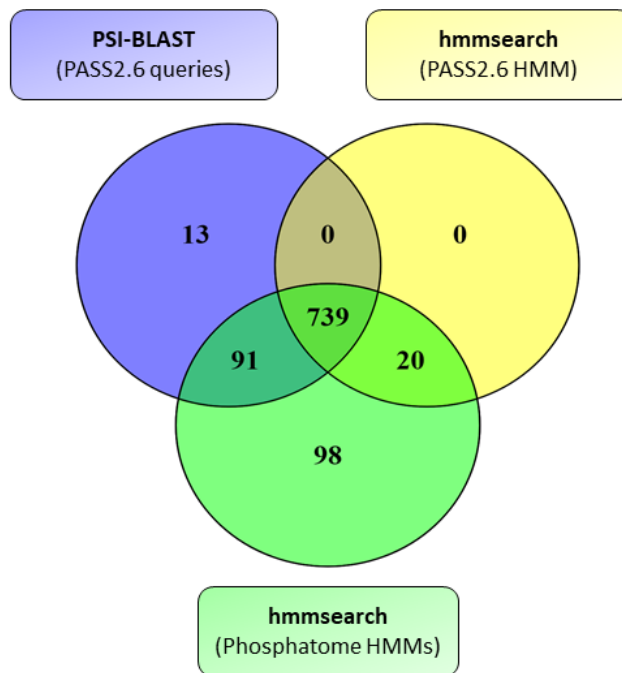

**Supplementary Figure 1:** Venn diagram representing the comparison of results obtained by carrying out sequence search using the PASS2.6 HMMs (hmmsearch) or query sequences (PSI-BLAST) with that obtained with HMMs obtained from the Phosphatome database (Chen et al., 2017). The 98 hits that were picked up by hmmsearch using Phosphatome HMM as query and not by other searches using PASS2.6 queries, correspond to inositol phosphatases and other lipid phosphatases, which do not come under the classification of PTPs that we have followed (Figure 1). We also compared hits obtained using different E-values and observed that maximum number of true positives are retained when E-value for PSI-BLAST and PHI-BLAST searches are 0.00001 and 0.1 for hmmsearch.

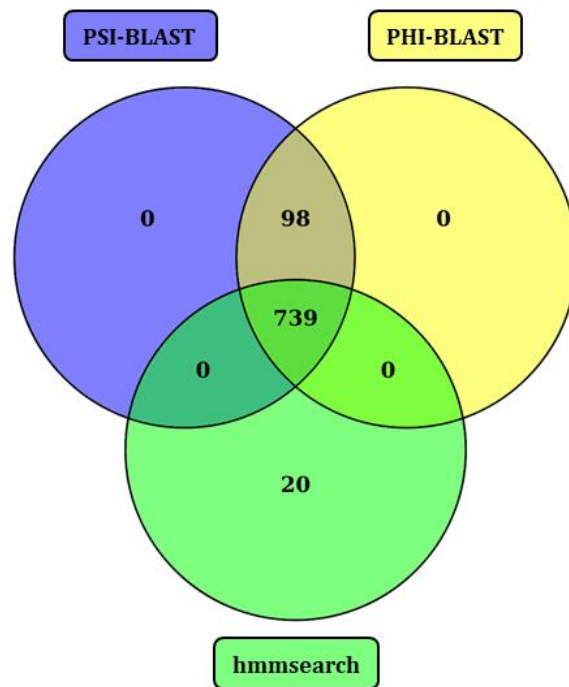

**Supplementary Figure 2:** Venn diagram representing hits picked up by multiple sequence search methods. A total of 739 hits were picked up by all three sequence search methods, 98 hits were picked up by the two profile-based search methods (PSI- and PHI-BLAST) and 20 by only the HMM based search method (hmmsearch).



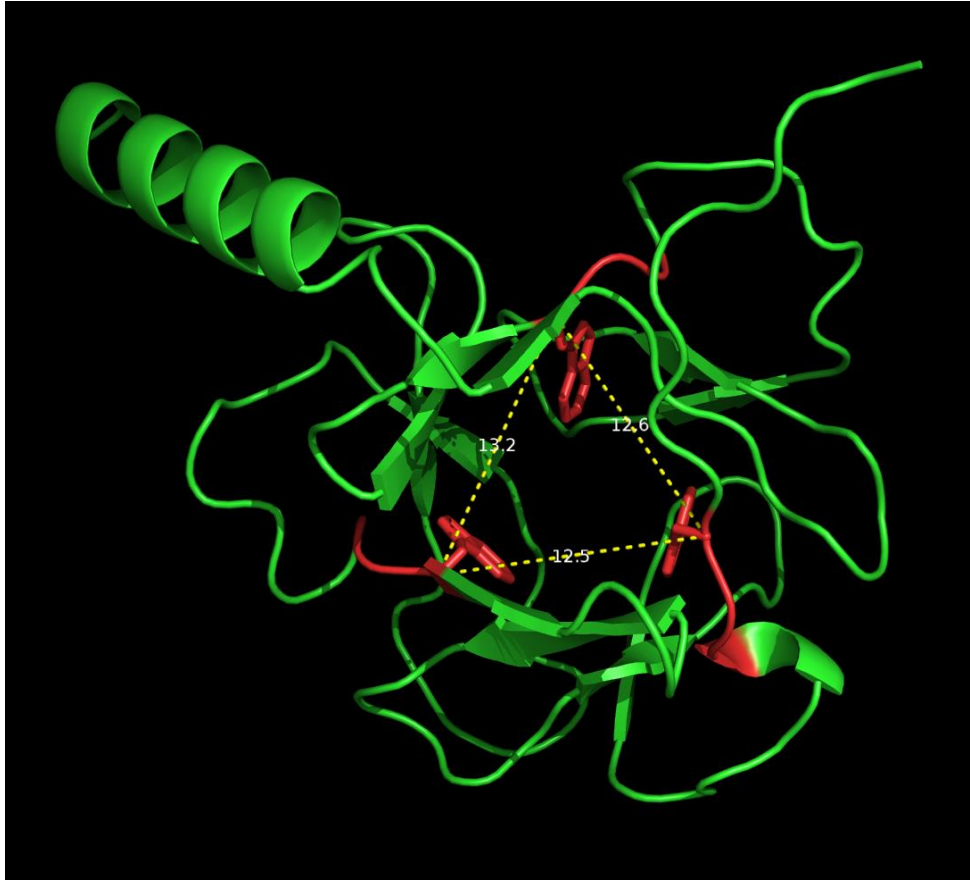

**Supplementary Figure 4:** The Ricin B-lectin domain of PTPRB: In the gene models of the PTPRB transcripts in Ensembl, we found that the predicted domain maps to the 2nd exon (ENSE00003551578) and the transcripts were annotated with the Ricin B-lectin domain as well. Homology model of the Ricin B-lectin domain of the PTPRB sequence was obtained using d1xhba1 structure as a template (Supplementary Table 3). Using MODELLER single template modelling and added restraints based on PSI-PRED results, the model was obtained. The PROSA Z-score was -3.48, falling in the region of published X-ray and NMR structures. The three tryptophans, which are part of the characteristic (Q-X-W)<sub>3</sub> motif, are almost equidistant from each other (C<sup>α</sup> distance) and are marked in red.
